# Supplementary material for: Postapproval studies of drugs initially approved by the FDA on the basis of limited evidence: systematic review
Source: PubMed Central journal article supplement — BMJ. 2017 May 3;357:j1680. doi: 10.1136/bmj.j1680 (PMC5421452; doi:10.1136/bmj.j1680), 2017-05-03
Supplement: peaa036854.ww1.pdf [file peaa036854.ww1.pdf]

# SUPPLEMENTARY CONTENT

## Postapproval Studies of Drugs Initially Approved by the FDA on the Basis of Limited Evidence: Systematic Review

Alison M. Pease, BS; Harlan M. Krumholz, MD, SM; Nicholas S. Downing, MD;

Jenerius A. Aminawung, MD, MPH; Nilay D. Shah, PhD; Joseph S. Ross, MD, MHS

### TABLE OF CONTENTS

**APPENDIX TABLE 1.** Aggregated post-approval studies of novel therapeutics approved by the Food and Drug Administration between 2005 and 2012 on the basis of a single pivotal trial, pivotal trials that used surrogate markers of disease as primary endpoints, or both (“single/surrogate”), stratified by approval year category. .... Page 3

**APPENDIX TABLE 2.** Aggregated post-approval studies of novel therapeutics approved by the Food and Drug Administration between 2005 and 2012 on the basis of a single pivotal trial, pivotal trials that used surrogate markers of disease as primary endpoints, or both (“single/surrogate”), stratified by therapeutic area. .... Page 6

**APPENDIX TABLE 3.** Aggregated post-approval studies of novel therapeutics approved by the Food and Drug Administration between 2005 and 2012 on the basis of a single pivotal trial, pivotal trials that used surrogate markers of disease as primary endpoints, or both (“single/surrogate”), stratified by expected length of treatment. .... Page 10

**APPENDIX FIGURE 1.** Cumulative comparative efficacy studies for each novel therapeutic approved by the Food and Drug Administration between 2005 and 2012 on the basis of a single pivotal trial, pivotal trials that used surrogate markers of disease as primary endpoints, or both (“single/surrogate”), by years since approval; (a) single pivotal approval studies, (b) surrogate approval studies, (c) single/surrogate approval studies..  
..... Page 13

**APPENDIX FIGURE 2.** Cumulative intervention patients enrolled in comparative efficacy studies for each novel therapeutic approved by the Food and Drug Administration between 2005 and 2012 on the basis of a single pivotal trial, pivotal trials that used surrogate markers of disease as primary endpoints, or both (“single/surrogate”), by years since approval; (a) single pivotal approval patient enrollment, (b) surrogate approval patient enrollment, (c) single/surrogate approval patient enrollment. .... Page 19

**APPENDIX FIGURE 3:** Cumulative intervention patient-years exposure among patients enrolled in in comparative efficacy studies for each novel therapeutic approved by the Food and Drug Administration between 2005 and 2012 on the basis of a single pivotal trial, pivotal trials that used surrogate markers of disease as primary endpoints, or both (“single/surrogate”), by years since approval; (a) single pivotal approval patient-years exposure, (b) surrogate approval patient-years exposure, (c) single/surrogate approval patient-years exposure. .... Page 25

**APPENDIX 1.** Aggregated studies and patients enrolled among post-approval studies of novel therapeutics approved by the Food and Drug Administration between 2005 and 2012 on the basis of a single pivotal trial, pivotal trials that used surrogate markers of disease as primary endpoints, or both (“single/surrogate”), stratified by approval year category.

| <b>Appendix 1</b>                                    |                          |                     |                     |                            |                     |                        |                                   |                     |                     |
|------------------------------------------------------|--------------------------|---------------------|---------------------|----------------------------|---------------------|------------------------|-----------------------------------|---------------------|---------------------|
|                                                      | Single Pivotal Approvals |                     |                     | Surrogate Marker Approvals |                     |                        | Single/Surrogate Marker Approvals |                     |                     |
|                                                      | 2005-2007<br>(n=11)      | 2008-2010<br>(n=10) | 2011-2012<br>(n=12) | 2005-2007<br>(n=19)        | 2008-2010<br>(n=16) | 2011-2012<br>(n=15)    | 2005-2007<br>(n=14)               | 2008-2010<br>(n=11) | 2011-2012<br>(n=16) |
| Median Trials Per Indication,<br>No. (IQR)           | 0<br>(0-1)               | 1.5<br>(0-2.25)     | 0.5<br>(0-1)        | 5<br>(1-40)                | 2<br>(0-18)         | 3<br>(1-6)             | 3<br>(1-17.25)                    | 1<br>(0-2)          | 0<br>(0-0)          |
| <i>p</i> -value                                      |                          | 0.36                |                     |                            | 0.17                |                        |                                   | < 0.0001            |                     |
| Median Randomized/Double-<br>Blind Trials, No. (IQR) | 0<br>(0-0)               | 0<br>(0-2)          | 0<br>(0-1)          | 1<br>(0-9)                 | 2<br>(0-3)          | 1<br>(0-3)             | 0<br>(0-1.5)                      | 0<br>(0-1)          | 0<br>(0-0)          |
| <i>p</i> -value                                      |                          | 0.32                |                     |                            | 0.96                |                        |                                   | 0.02                |                     |
| Median Total Patients<br>Enrolled, No. (IQR)         | 0<br>(0-233)             | 108<br>(0-1347)     | 162<br>(0-1036)     | 1207<br>(205-8130)         | 256<br>(0-2552)     | 1042<br>(100-2964)     | 796<br>(43-4423)                  | 92<br>(0-471)       | 0<br>(0-0)          |
| <i>p</i> -value                                      |                          | 0.68                |                     |                            | 0.24                |                        |                                   | 0.0003              |                     |
| Median Intervention Patients<br>Enrolled, No. (IQR)  | 0<br>(0-119)             | 67<br>(0-667)       | 110<br>(0-541)      | 696<br>(144-3821)          | 155<br>(0-1211)     | 641<br>(75-1733)       | 514<br>(21-2366)                  | 63<br>(0-337)       | 0<br>(0-0)          |
| <i>p</i> -value                                      |                          | 0.67                |                     |                            | 0.23                |                        |                                   | 0.0003              |                     |
| Median Total Patient-Years<br>Exposure, No. (IQR)    | 0<br>(0-135.0)           | 138.8<br>(0-558.8)  | 43.2<br>(0-677.5)   | 1210.3                     | 101.2<br>(0-1513.6) | 858.7<br>(76.6-2033.4) | 1135.1                            | 98.8<br>(0-790.8)   | 0<br>(0-0)          |

|                                                                                                            |               |                   |                   |                            |                   |                       |                           |                   |            |
|------------------------------------------------------------------------------------------------------------|---------------|-------------------|-------------------|----------------------------|-------------------|-----------------------|---------------------------|-------------------|------------|
|                                                                                                            |               |                   |                   | (116.6-<br>6594.9)         | 0.12              |                       | (15.4-<br>4319.4)         |                   | 0.0005     |
| <i>p</i> -value                                                                                            |               | 0.60              |                   |                            |                   |                       |                           |                   |            |
| Median Intervention Patient-<br>Years Exposure, No. (IQR)                                                  | 0<br>(0-90.0) | 49.4<br>(0-334.4) | 18.0<br>(0-392.6) | 661.1<br>(65.2-<br>3729.0) | 69.2<br>(0-741.3) | 557.5<br>(39.2-832.2) | 726.2<br>(8.1-<br>2301.9) | 61.2<br>(0-393.8) | 0<br>(0-0) |
| <i>p</i> -value                                                                                            |               | 0.61              |                   |                            | 0.13              |                       |                           |                   | 0.0006     |
| Indications with $\geq 1$ Trial, No.<br>(%)                                                                | 5 (45.5)      | 7 (70.0)          | 6 (50.0)          | 18 (94.7)                  | 12 (75.0)         | 12 (80.0)             | 12 (85.7)                 | 7 (63.6)          | 2 (12.5)   |
| <i>p</i> -value                                                                                            |               | 0.75              |                   |                            | 0.34              |                       |                           |                   | 0.0001     |
| Indications with $\geq 1$<br>Randomized/Double-Blind<br>Trial, No. (%)                                     | 2 (18.2)      | 4 (40.0)          | 4 (33.3)          | 10 (52.6)                  | 12 (75.0)         | 10 (66.7)             | 6 (42.9)                  | 3 (27.3)          | 0 (0.0)    |
| <i>p</i> -value                                                                                            |               | 0.57              |                   |                            | 0.62              |                       |                           |                   | 0.007      |
| Indications with $\geq 1$<br>Randomized/Double-Blind<br>Trial with a Clinical Primary<br>Endpoint, No. (%) | 2 (18.2)      | 4 (40.0)          | 4 (33.3)          | 1 (5.3)                    | 2 (12.5)          | 1 (6.7)               | 3 (21.4)                  | 0 (0.0)           | 0 (0.0)    |
| <i>p</i> -value                                                                                            |               | 0.57              |                   |                            | 0.82              |                       |                           |                   | 0.16       |
| Indications with $\geq 1$ Trial<br>Demonstrating Superiority or                                            | 2 (18.2)      | 3 (30.0)          | 4 (33.3)          | 15 (78.9)                  | 12 (75.0)         | 11 (73.3)             | 10 (71.4)                 | 4 (36.4)          | 1 (6.3)    |

|                                                                                                                                        |      |  |  |      |  |  |        |  |  |
|----------------------------------------------------------------------------------------------------------------------------------------|------|--|--|------|--|--|--------|--|--|
| Non-Inferiority of the Primary Endpoint, No. (%)                                                                                       |      |  |  |      |  |  |        |  |  |
| <i>p</i> -value                                                                                                                        | 0.79 |  |  | 0.92 |  |  | 0.0008 |  |  |
| Indications with ≥1 Randomized/Double-Blind Trial Demonstrating Superiority or Non-Inferiority, No. (%)                                |      |  |  |      |  |  |        |  |  |
| <i>p</i> -value                                                                                                                        | 0.44 |  |  | 0.82 |  |  | 0.06   |  |  |
| Indications with ≥1 Randomized/Double-Blind Trial Demonstrating Superiority or Non-Inferiority of a Clinical Primary Endpoint, No. (%) |      |  |  |      |  |  |        |  |  |
| <i>p</i> -value                                                                                                                        | 0.74 |  |  | 0.52 |  |  | 0.35   |  |  |

**APPENDIX 2.** Aggregated studies and patients enrolled among post-approval studies of novel therapeutics approved by the Food and Drug Administration between 2005 and 2012 on the basis of a single pivotal trial, pivotal trials that used surrogate markers of disease as primary endpoints, or both (“single/surrogate”), stratified by therapeutic area.

| Appendix 2                                        |                          |                      |              |                 |                            |                        |                     |                  |                                   |                         |                 |                 |
|---------------------------------------------------|--------------------------|----------------------|--------------|-----------------|----------------------------|------------------------|---------------------|------------------|-----------------------------------|-------------------------|-----------------|-----------------|
|                                                   | Single Pivotal Approvals |                      |              |                 | Surrogate Marker Approvals |                        |                     |                  | Single/Surrogate Marker Approvals |                         |                 |                 |
|                                                   | Cardio &                 |                      |              |                 | Cardio &                   |                        |                     |                  | Cardio &                          |                         |                 |                 |
|                                                   | Cancer<br>(n=9)          | DM<br>(n=5)          | ID<br>(n=3)  | Other<br>(n=16) | Cancer<br>(n=8)            | DM<br>(n=13)           | ID<br>(n=11)        | Other<br>(n=18)  | Cancer<br>(n=24)                  | DM<br>(n=2)             | ID<br>(n=3)     | Other<br>(n=12) |
| Median Trials Per Indication, No. (IQR)*          | 1<br>(0-1.5)             | 3<br>(1-26.5)        | 0<br>(0-2)   | 0<br>(0-1)      | 1<br>(0-2.75)              | 18<br>(1.5-52)         | 6<br>(3-27)         | 2<br>(1-3.5)     | 0.5<br>(0-1.75)                   | 23.5<br>(21-26)         | 1<br>(0-17)     | 0<br>(0-1)      |
| <i>p</i> -value                                   | 0.08                     |                      |              |                 | 0.003                      |                        |                     |                  | 0.07                              |                         |                 |                 |
| Median Randomized/Double-Blind Trials, No. (IQR)* | 0<br>(0-1)               | 1<br>(0-4)           | 0<br>(0-0)   | 0<br>(0-0.75)   | 0<br>(0-0)                 | 5<br>(1-23.5)          | 1<br>(0-3)          | 1<br>(0-2)       | 0<br>(0-0)                        | 2<br>(1-3)              | 0<br>(0-3)      | 0<br>(0-1)      |
| <i>p</i> -value                                   | 0.24                     |                      |              |                 | 0.0005                     |                        |                     |                  | 0.02                              |                         |                 |                 |
| Median Total Patients Enrolled, No. (IQR)         | 502<br>(0-1225)          | 1554<br>(258-10,141) | 0<br>(0-389) | 0<br>(0-122)    | 215<br>(0-708)             | 4332<br>(186.5-17,722) | 2964<br>(1042-4955) | 225<br>(122-603) | 22<br>(0-712)                     | 38,816<br>(4154-73,477) | 440<br>(0-2164) | 0<br>(0-60)     |

|                                                       |                     |                        |               |                |                     |                         |                          |                      |                   |                               |                    |               |
|-------------------------------------------------------|---------------------|------------------------|---------------|----------------|---------------------|-------------------------|--------------------------|----------------------|-------------------|-------------------------------|--------------------|---------------|
| <i>p</i> -value                                       | 0.07                |                        |               |                | 0.003               |                         |                          |                      | 0.07              |                               |                    |               |
| Median Intervention Patients Enrolled, No. (IQR)      | 250<br>(0-632)      | 691<br>(55-3437)       | 0<br>(0-187)  | 0<br>(0-80)    | 121<br>(0-353)      | 3174<br>(94.5-9181)     | 863<br>(641-2472)        | 174<br>(104-466)     | 11<br>(0-381)     | 10,761<br>(2286-19,236)       | 218<br>(0-1098)    | 0<br>(0-57)   |
| <i>p</i> -value                                       | 0.13                |                        |               |                | 0.005               |                         |                          |                      | 0.08              |                               |                    |               |
| Median Total Patient-Years Exposure, No. (IQR)        | 434.4<br>(0-1910.0) | 233.0<br>(43.2-8978.8) | 0<br>(0-68.6) | 0<br>(0-168.2) | 280.1<br>(0-1188.3) | 2033.4<br>(70.8-8023.7) | 3021.3<br>(961.8-5026.2) | 101.2<br>(8.0-487.2) | 39.8<br>(0-938.2) | 20,387.8<br>(3379.7-37,396.0) | 84.6<br>(0-1862.7) | 0<br>(0-17.9) |
| <i>p</i> -value                                       | 0.24                |                        |               |                | 0.004               |                         |                          |                      | 0.09              |                               |                    |               |
| Median Intervention Patient-Years Exposure, No. (IQR) | 216.3<br>(0-968.9)  | 42.0<br>(18.0-2058.1)  | 0<br>(0-32.7) | 0<br>(0-91.2)  | 145.1<br>(0-622.9)  | 1131.7<br>(36.1-3966.6) | 832.2<br>(591.7-2582.4)  | 69.2<br>(6.5-319.5)  | 19.0<br>(0-628.3) | 5876.7<br>(1882.4-9871.1)     | 41.9<br>(0-915.3)  | 0<br>(0-13.3) |
| <i>p</i> -value                                       | 0.35                |                        |               |                | 0.003               |                         |                          |                      | 0.09              |                               |                    |               |
| Indications with ≥1 Trial                             | 6 (66.7)            | 4 (80.0)               | 1<br>(33.3)   | 7 (43.8)       | 5 (62.5)            | 12 (92.3)               | 10 (90.9)                | 15 (83.3)            | 12 (50.0)         | 2 (100.0)                     | 2 (66.7)           | 5 (41.7)      |
| <i>p</i> -value                                       | 0.58                |                        |               |                | 0.11                |                         |                          |                      | 0.62              |                               |                    |               |
| Indications with ≥1 Randomized/                       | 3 (33.3)            | 3 (60.0)               | 0 (0.0)       | 4 (25.0)       | 0 (0.0)             | 11 (84.6)               | 8 (72.7)                 | 13 (72.2)            | 2 (8.3)           | 2 (100.0)                     | 1 (33.3)           | 4 (33.3)      |

|                                                                                                                  |          |          |             |          |          |           |           |           |          |           |          |          |
|------------------------------------------------------------------------------------------------------------------|----------|----------|-------------|----------|----------|-----------|-----------|-----------|----------|-----------|----------|----------|
| Double-Blind<br>Trial                                                                                            |          |          |             |          |          |           |           |           |          |           |          |          |
| <i>p</i> -value                                                                                                  | 0.36     |          |             |          | 0.0006   |           |           |           | 0.01     |           |          |          |
| Indications with<br>≥1 Randomized/<br>Double-Blind<br>Trial with a<br>Clinical Primary<br>Endpoint               | 3 (33.3) | 3 (60.0) | 0 (0.0)     | 4 (25.0) | 0 (0.0)  | 2 (15.4)  | 0 (0.0)   | 2 (11.1)  | 1 (4.2)  | 0 (0.0)   | 1 (33.3) | 1 (8.3)  |
| <i>p</i> -value                                                                                                  | 0.36     |          |             |          | 0.56     |           |           |           | 0.13     |           |          |          |
| Indications with<br>≥1 Trial<br>Demonstrating<br>Superiority or<br>Non-Inferiority of<br>the Primary<br>Endpoint | 3 (33.3) | 3 (60.0) | 1<br>(33.3) | 2 (12.5) | 3 (37.5) | 11 (84.6) | 10 (90.9) | 14 (77.8) | 7 (29.2) | 2 (100.0) | 2 (66.7) | 4 (33.3) |
| <i>p</i> -value                                                                                                  | 0.14     |          |             |          | 0.07     |           |           |           | 0.15     |           |          |          |
| Indications with<br>≥1 Randomized/<br>Double-Blind                                                               | 3 (33.3) | 2 (40.0) | 0 (0.0)     | 2 (12.5) | 0 (0.0)  | 11 (84.6) | 7 (63.6)  | 11 (61.1) | 2 (8.3)  | 0 (0.0)   | 1 (33.3) | 3 (25.0) |



|                                                                                                                                                                                                            |                 |                 |                |                 |                                                                                                                          |  |  |  |
|------------------------------------------------------------------------------------------------------------------------------------------------------------------------------------------------------------|-----------------|-----------------|----------------|-----------------|--------------------------------------------------------------------------------------------------------------------------|--|--|--|
| <p>Trial<br/>Demonstrating<br/>Superiority or<br/>Non-Inferiority</p> <p><i>p</i>-value</p> <p>0.33</p>                                                                                                    |                 |                 |                |                 | <p>0.001</p> <p>0.34</p>                                                                                                 |  |  |  |
| <p>Indications with<br/>≥1 Randomized/<br/>Double-Blind<br/>Trial</p> <p>Demonstrating<br/>Superiority or<br/>Non-Inferiority of<br/>a Clinical Primary<br/>Endpoint</p> <p><i>p</i>-value</p> <p>0.42</p> | <p>2 (22.2)</p> | <p>2 (40.0)</p> | <p>0 (0.0)</p> | <p>2 (12.5)</p> | <p>0 (0.0)    0 (0.0)    0 (0.0)    2 (11.1)</p> <p>0.65</p> <p>1 (4.2)    0 (0.0)    0 (0.0)    1 (8.3)</p> <p>0.50</p> |  |  |  |

**APPENDIX 3.** Aggregated studies and patients enrolled among post-approval studies of novel therapeutics approved by the Food and Drug Administration between 2005 and 2012 on the basis of a single pivotal trial, pivotal trials that used surrogate markers of disease as primary endpoints, or both (“single/surrogate”), stratified by expected length of treatment.

| <b>Appendix 3</b>                                    |                          |                        |                   |                            |                       |                          |                                   |                        |                   |
|------------------------------------------------------|--------------------------|------------------------|-------------------|----------------------------|-----------------------|--------------------------|-----------------------------------|------------------------|-------------------|
|                                                      | Single Pivotal Approvals |                        |                   | Surrogate Marker Approvals |                       |                          | Single/Surrogate Marker Approvals |                        |                   |
|                                                      | Acute<br>(n=4)           | Intermediate<br>(n=12) | Chronic<br>(n=17) | Acute<br>(n=7)             | Intermediate<br>(n=9) | Chronic<br>(n=34)        | Acute<br>(n=4)                    | Intermediate<br>(n=24) | Chronic<br>(n=13) |
| Median Trials Per Indication,<br>No. (IQR)           | 0<br>(0-0.75)            | 1<br>(0.25-1.75)       | 0<br>(0-2)        | 1<br>(1-6)                 | 1<br>(0-2.5)          | 4.5<br>(2-18.5)          | 1<br>(0.25-1)                     | 0.5<br>(0-1.75)        | 0<br>(0-13.5)     |
| <i>p</i> -value                                      |                          | 0.49                   |                   |                            | 0.02                  |                          |                                   | 0.86                   |                   |
| Median Randomized/Double-<br>Blind Trials, No. (IQR) | 0<br>(0-0.75)            | 0<br>(0-1)             | 0<br>(0-1)        | 1<br>(1-2)                 | 0<br>(0-0)            | 1<br>(0-5.75)            | 0.5<br>(0-1)                      | 0<br>(0-0)             | 0<br>(0-2)        |
| <i>p</i> -value                                      |                          | 0.93                   |                   |                            | 0.005                 |                          |                                   | 0.06                   |                   |
| Median Total Patients<br>Enrolled, No. (IQR)         | 0<br>(0-94)              | 173<br>(10-1036)       | 0<br>(0-453)      | 173<br>(100-455)           | 205<br>(0-605)        | 1381<br>(248-5749)       | 56<br>(12-346)                    | 22<br>(0-712)          | 0<br>(0-3056)     |
| <i>p</i> -value                                      |                          | 0.48                   |                   |                            | 0.03                  |                          |                                   | 0.98                   |                   |
| Median Intervention Patients<br>Enrolled, No. (IQR)  | 0<br>(0-59)              | 100<br>(10-541)        | 0<br>(0-235)      | 143<br>(75-229)            | 138<br>(0-302)        | 777<br>(160-3336)        | 52<br>(10-179)                    | 11<br>(0-381)          | 0<br>(0-1507)     |
| <i>p</i> -value                                      |                          | 0.43                   |                   |                            | 0.03                  |                          |                                   | 0.98                   |                   |
| Median Total Patient-Years<br>Exposure, No. (IQR)    | 0<br>(0-5.4)             | 195.8<br>(7.5-1592.7)  | 0<br>(0-251.7)    | 17.3<br>(2.1-830.3)        | 130.1<br>(0-941.7)    | 1064.9<br>(112.8-4218.8) | 9.6<br>(1.2-67.1)                 | 39.8<br>(0-938.2)      | 0<br>(0-2621.2)   |

|                                                                                                                        |              |                     |                |                     |                   |                        |                   |                   |                 |
|------------------------------------------------------------------------------------------------------------------------|--------------|---------------------|----------------|---------------------|-------------------|------------------------|-------------------|-------------------|-----------------|
| <i>p</i> -value                                                                                                        | 0.30         |                     |                | 0.02                |                   |                        | 0.96              |                   |                 |
| Median Intervention Patient-<br>Years Exposure, No. (IQR)                                                              | 0<br>(0-3.4) | 98.8<br>(3.8-809.0) | 0<br>(0-149.7) | 10.3<br>(2.1-362.9) | 69.0<br>(0-532.0) | 614.7<br>(66.5-2353.3) | 9.2<br>(1.0-35.1) | 19.0<br>(0-628.3) | 0<br>(0-1398.8) |
| <i>p</i> -value                                                                                                        | 0.25         |                     |                | 0.02                |                   |                        | 0.98              |                   |                 |
| Indications with $\geq 1$ Trial, No.<br>(%)                                                                            | 1 (25.0)     | 9 (75.0)            | 8 (47.1)       | 6 (85.7)            | 5 (55.6)          | 30 (88.2)              | 3 (75.0)          | 12 (50.0)         | 6 (46.2)        |
| <i>p</i> -value                                                                                                        | 0.63         |                     |                | 0.13                |                   |                        | 0.73              |                   |                 |
| Indications with $\geq 1$<br>Randomized/Double-Blind<br>Trial, No. (%)                                                 | 1 (25.0)     | 4 (33.3)            | 5 (29.4)       | 6 (85.7)            | 1 (11.1)          | 25 (73.5)              | 2 (50.0)          | 2 (8.3)           | 5 (38.5)        |
| <i>p</i> -value                                                                                                        | 0.99         |                     |                | 0.002               |                   |                        | 0.03              |                   |                 |
| Indications with $\geq 1$<br>Randomized/Double-Blind<br>Trial with a Clinical Primary<br>Endpoint, No. (%)             | 1 (25.0)     | 4 (33.3)            | 5 (29.4)       | 1 (14.3)            | 0 (0.0)           | 3 (8.8)                | 0 (0.0)           | 1 (4.2)           | 2 (15.4)        |
| <i>p</i> -value                                                                                                        | 0.99         |                     |                | 0.56                |                   |                        | 0.13              |                   |                 |
| Indications with $\geq 1$ Trial<br>Demonstrating Superiority or<br>Non-Inferiority of the Primary<br>Endpoint, No. (%) | 0 (0.0)      | 3 (25.0)            | 6 (35.3)       | 5 (71.4)            | 4 (44.4)          | 29 (85.3)              | 2 (50.0)          | 7 (29.2)          | 6 (46.2)        |
| <i>p</i> -value                                                                                                        | 0.49         |                     |                | 0.05                |                   |                        | 0.55              |                   |                 |

|                                                                                                                                                                                    |         |          |          |          |          |           |          |         |          |
|------------------------------------------------------------------------------------------------------------------------------------------------------------------------------------|---------|----------|----------|----------|----------|-----------|----------|---------|----------|
| <p>Indications with <math>\geq 1</math><br/>Randomized/Double-Blind<br/>Trial Demonstrating<br/>Superiority or Non-Inferiority,<br/>No. (%)</p>                                    | 0 (0.0) | 3 (25.0) | 4 (23.5) | 5 (71.4) | 1 (11.1) | 23 (67.6) | 1 (25.0) | 2 (8.3) | 3 (23.1) |
| <p><i>p</i>-value</p>                                                                                                                                                              |         | 0.71     |          |          | 0.01     |           |          | 0.30    |          |
| <p>Indications with <math>\geq 1</math><br/>Randomized/Double-Blind<br/>Trial Demonstrating<br/>Superiority or Non-Inferiority<br/>of a Clinical Primary<br/>Endpoint, No. (%)</p> | 0 (0.0) | 2 (16.7) | 4 (23.5) | 1 (14.3) | 0 (0.0)  | 1 (2.9)   | 0 (0.0)  | 1 (4.2) | 1 (6.5)  |
| <p><i>p</i>-value</p>                                                                                                                                                              |         | 0.84     |          |          | 0.29     |           |          | 0.47    |          |

**APPENDIX FIGURE 1.** Cumulative comparative efficacy studies for each novel therapeutic approved by the Food and Drug Administration between 2005 and 2012 on the basis of a single pivotal trial, pivotal trials that used surrogate markers of disease as primary endpoints, or both (“single/surrogate”), by years since approval; (a) single pivotal approval studies, (b) surrogate approval studies, (c) single/surrogate approval studies. See color key below.

\* Each year since approval estimated beginning at month-year of approval through following calendar year, with the final year concluding as of December 31, 2014 (the sample search cutoff date; thus, the final year may not represent a complete 12-month calendar year).

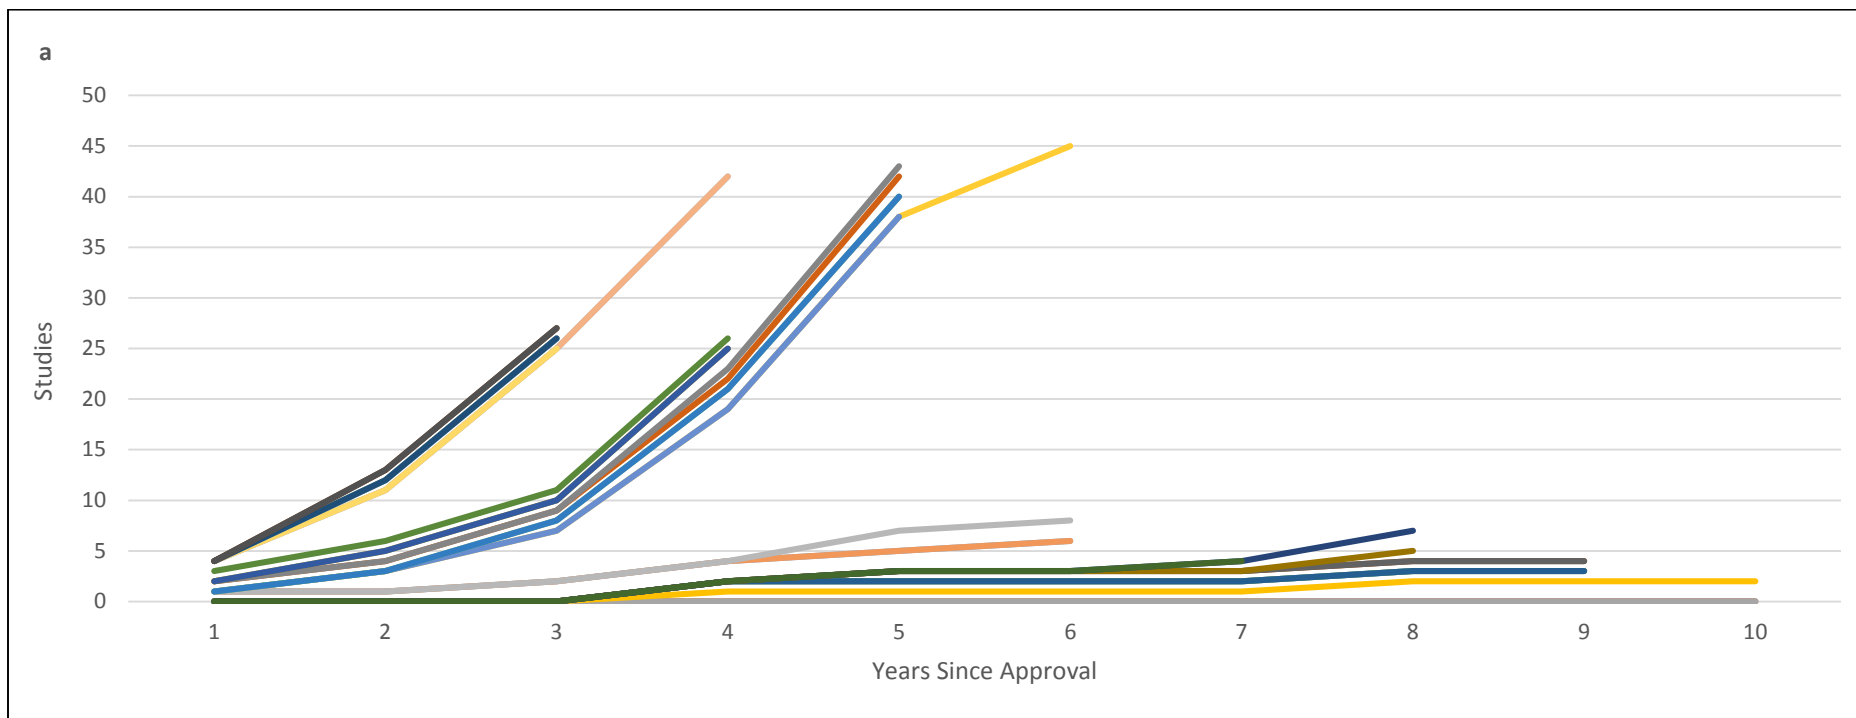

- Galsulfase: Indication 1: Mucopolysaccharidosis VI
- Mecasermin Rinfabate Recombinant: Indication 1: Growth failure
- Alglucosidase Alfa: Indication 1: Pompe Disease
- Anidulafungin: Indication 2: Esophageal candidiasis
- Idursulfase: Indication 1: Hunter Syndrome
- Temsirolimus: Indication 1: RCC
- Dronedarone Hydrochloride: Indication 1: Antiarrhythmic for AFib
- Golimumab: Indication 3: Ankylosing Spondylitis
- Cabazitaxel: Indication 1: Prostate cancer
- Eribulin Mesylate: Indication 1: Breast cancer
- Incobotulinumtoxina: Indication 2: Cervical Dystonia
- Clobazam: Indication 1: Lennox-Gastaut Syndrome
- Ticagrelor: Indication 1: Platelet inhibition s/p MI angina
- Apixaban: Indication 1: Prevention of stroke
- Enzalutamide: Indication 1: Metastatic prostate cancer
- Regorafenib: Indication 1: Metastatic CRC
- Ziv-Aflibercept: Indication 1: Metastatic CRC
- Mecasermin Recombinant: Indication 1: Growth failure
- Micafungin Sodium: Indication 2: HSCT prophylaxis against candida
- Anidulafungin: Indication 1: Candidemia
- Decitabine: Indication 1: MDS
- Retapamulin: Indication 1: Impetigo
- Riloncept: Indication 1: Familial Cold AutoInflam Syndrome
- Golimumab: Indication 2: Psoriatic Arthritis
- Prasugrel Hydrochloride: Indication 1: Platelet inhibitor s/p MI angina
- Dabigatran Etexilate Mesylate: Indication 1: Stroke and PE in Afib
- Incobotulinumtoxina: Indication 1: Blepharospasm
- Abiraterone Acetate: Indication 1: Prostate cancer
- Ipilimumab: Indication 1: Melanoma
- Vemurafenib: Indication 1: Melanoma
- Crofelemer: Indication 1: Diarrhea in HIV pts on ARV
- Lucinactant: Indication 1: RDS
- Teriflunomide: Indication 1: Relapsing MS

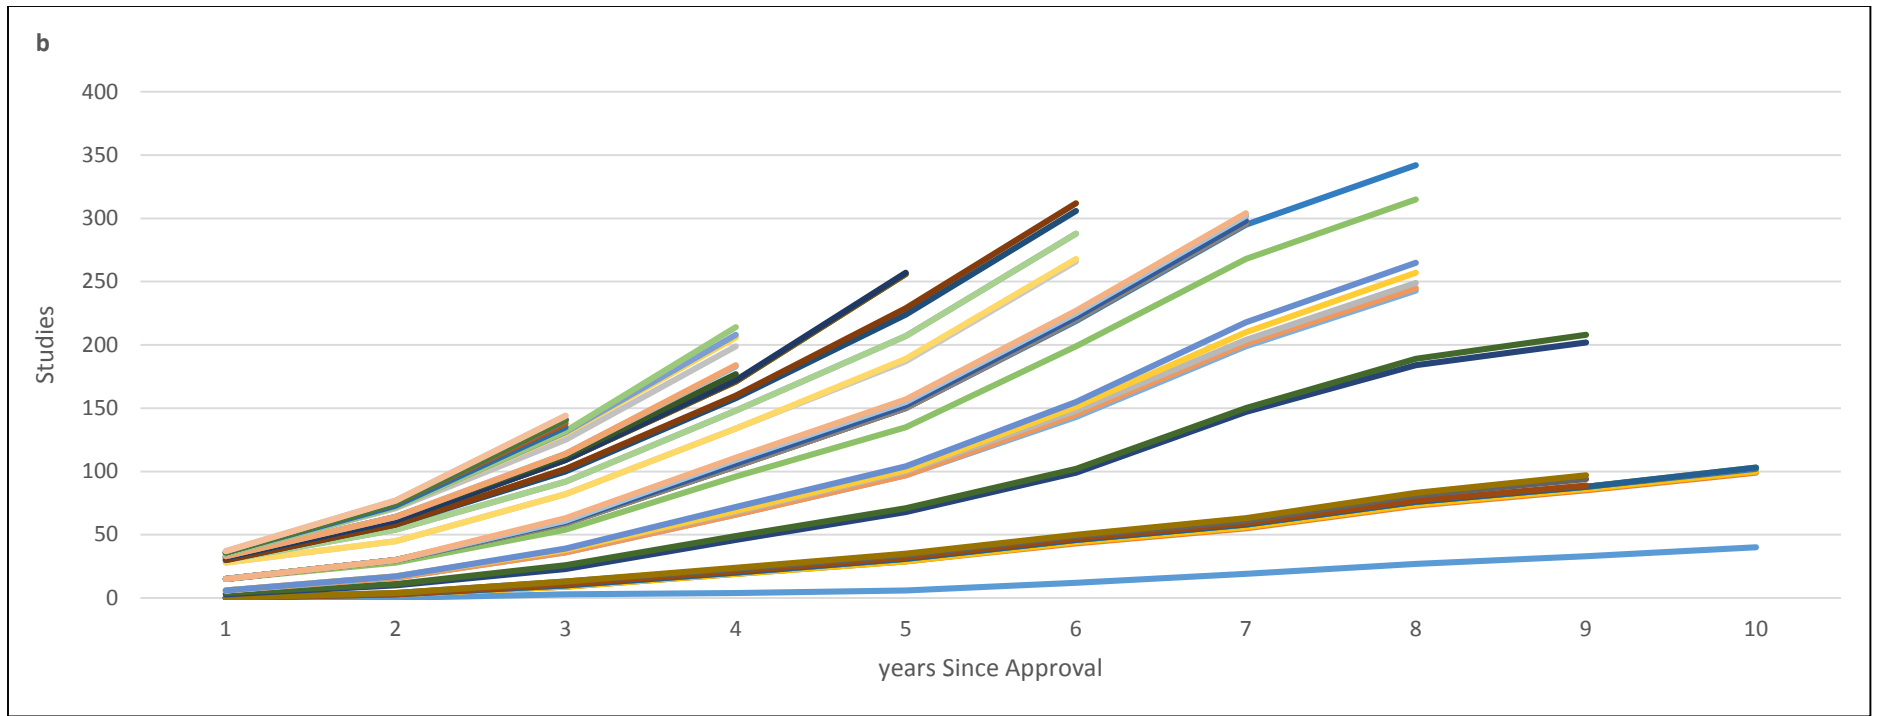

— Entecavir: Indication 1: HBV  
 — Lenalidomide: Indication 1: MDS  
 — Pramlintide Acetate: Indication 1: T2DM  
 — Tipranavir: Indication 1: HIV  
 — Darunavir Ethanolate: Indication 1: HIV  
 — Sitagliptin Phosphate: Indication 1: T2DM  
 — Aliskiren Hemifumarate: Indication 1: HTN  
 — Lanreotide Acetate: Indication 1: Acromegaly  
 — Methoxy Polyethylene Glycol-Epoetin Beta: Indication 1: Anemia assoc. with renal failure  
 — Raltegravir Potassium: Indication 1: HIV  
 — Clevidipine Butyrate: Indication 1: IntraOp BP  
 — Eltrombopag Olamine: Indication 1: Thrombocytopenia in ITP  
 — Plerixafor: Indication 1: Mobilization of HSCT in lymphoma and MM  
 — Artemether; Lumefantrine: Indication 1: Malaria  
 — Pitavastatin Calcium: Indication 1: Hyperlipidemia  
 — Saxagliptin Hydrochloride: Indication 1: T2DM  
 — Liraglutide Recombinant: Indication 1: T2DM  
 — Tesamorelin Acetate: Indication 1: HIV related fat  
 — Boceprevir: Indication 1: Hep C  
 — Indacaterol Maleate: Indication 1: COPD  
 — Rilpivirine Hydrochloride: Indication 1: HIV  
 — Acridinium Bromide: Indication 1: COPD  
 — Ivacaftor: Indication 1: Cystic Fibrosis  
 — Omacetaxine Mepesuccinate: Indication 1: CML  
 — Tafluprost: Indication 1: Open angle glaucoma / ocular htn  
 — Exenatide Synthetic: Indication 1: T2DM  
 — Nelarabine: Indication 1: Relapsed T-ALL or LBL  
 — Pramlintide Acetate: Indication 2: T1DM  
 — Avobenzone; Ecamsule; Octocrylene: Indication 1: Sunscreen  
 — Dasatinib: Indication 1: CML  
 — Sunitinib Malate: Indication 2: RCC  
 — Ixabepilone: Indication 1: Breast cancer  
 — Maraviroc: Indication 1: HIV  
 — Nebivolol Hydrochloride: Indication 1: HTN  
 — Alvimopan: Indication 1: GI recovery s/p surgery  
 — Difluprednate: Indication 1: Ocular pain  
 — Etravirine: Indication 1: HIV  
 — Romiplostim: Indication 1: Thrombocytopenia in ITP  
 — Febuxostat: Indication 1: Gout  
 — Romidepsin: Indication 1: CTCL  
 — Tolvaptan: Indication 1: Hyponatremia  
 — Pegloticase: Indication 1: Gout  
 — Azilsartan Medoxomil: Indication 1: HTN  
 — Crizotinib: Indication 1: Lung cancer  
 — Linagliptin: Indication 1: T2DM  
 — Telaprevir: Indication 1: Hep C  
 — Cobicistat; Elvitegravir; Emtricitabine; Tenofovir Disoproxil Fumarate: Indication 1: HIV  
 — Ocriplasmin: Indication 1: Symptomatic vitreomacular adhesion  
 — Peginesatide Acetate: Indication 1: Anemia in CKD  
 — Taliglucerase Alfa: Indication 1: Gaucher Disease





— Conivaptan Hydrochloride: Indication 1: Hyponatremia  
 — Insulin Detemir Recombinant: Indication 1: T1DM  
 — Sorafenib Tosylate: Indication 1: RCC  
 — Panitumumab: Indication 1: Colorectal cancer  
 — Telbivudine: Indication 1: Hep B  
 — Eculizumab: Indication 1: PNH  
 — Nilotinib Hydrochloride Monohydrate: Indication 1: CML  
 — Bendamustine Hydrochloride: Indication 1: CLL  
 — Canakinumab: Indication 1: Muckle-Wells Syndrome  
 — Ofatumumab: Indication 1: CLL  
 — Pralatrexate: Indication 1: CTCL  
 — Denosumab: Indication 1: Osteoporosis  
 — Velaglucerase Alfa: Indication 1: Gaucher Disease  
 — Brentuximab Vedotin: Indication 1: Hodgkin Lymphoma  
 — Ruxolitinib Phosphate: Indication 1: Myelofibrosis  
 — Axitinib: Indication 1: RCC  
 — Bosutinib Monohydrate: Indication 1: CML  
 — Carfilzomib: Indication 1: Multiple myeloma  
 — Pasireotide Diaspartate: Indication 1: Cushing's Disease  
 — Ponatinib Hydrochloride: Indication 1: Ph+ heme malignancy  
 — Vismodegib: Indication 1: BCC  
 — Deferasirox: Indication 1: Fe overload  
 — Insulin Detemir Recombinant: Indication 2: T2DM  
 — Bismuth Subcitrate Potassium; Metronidazole; Tetracycline: Indication 1: H Pylori  
 — Sunitinib Malate: Indication 1: GIST  
 — Vorinostat: Indication 1: CTCL  
 — Lapatinib Ditosylate: Indication 1: Breast cancer  
 — Sapropterin Dihydrochloride: Indication 1: PKU  
 — Degarelix Acetate: Indication 1: Prostate Cancer  
 — Everolimus: Indication 1: RCC  
 — Pazopanib Hydrochloride: Indication 1: RCC  
 — Carglumic Acid: Indication 1: NAS deficiency  
 — Polidocanol: Indication 1: Varicose veins  
 — Asparaginase Erwinia Chrysanthemi: Indication 1: ALL  
 — Brentuximab Vedotin: Indication 1: Large cell lymphoma  
 — Vandetanib: Indication 1: Medullary thyroid cancer  
 — Bedaquiline Fumarate: Indication 1: MDR-TB  
 — Cabozantinib S-Malate: Indication 1: Medullary thyroid cancer  
 — Lomitapide Mesylate: Indication 1: Homozygous familial hypercholesterolemia  
 — Pertuzumab: Indication 1: Breast cancer  
 — Tbo-Filgrastim: Indication 1: Neutropenia

**APPENDIX FIGURE 2.** Cumulative intervention patients enrolled in comparative efficacy studies for each novel therapeutic approved by the Food and Drug Administration between 2005 and 2012 on the basis of a single pivotal trial, pivotal trials that used surrogate markers of disease as primary endpoints, or both (“single/surrogate”), by years since approval; (a) single pivotal approval patient enrollment, (b) surrogate approval patient enrollment, (c) single/surrogate approval patient enrollment. See color key below.

\* Each year since approval estimated beginning at month-year of approval through following calendar year, with the final year concluding as of December 31, 2014 (the sample search cutoff date; thus, the final year may not represent a complete 12-month calendar year).

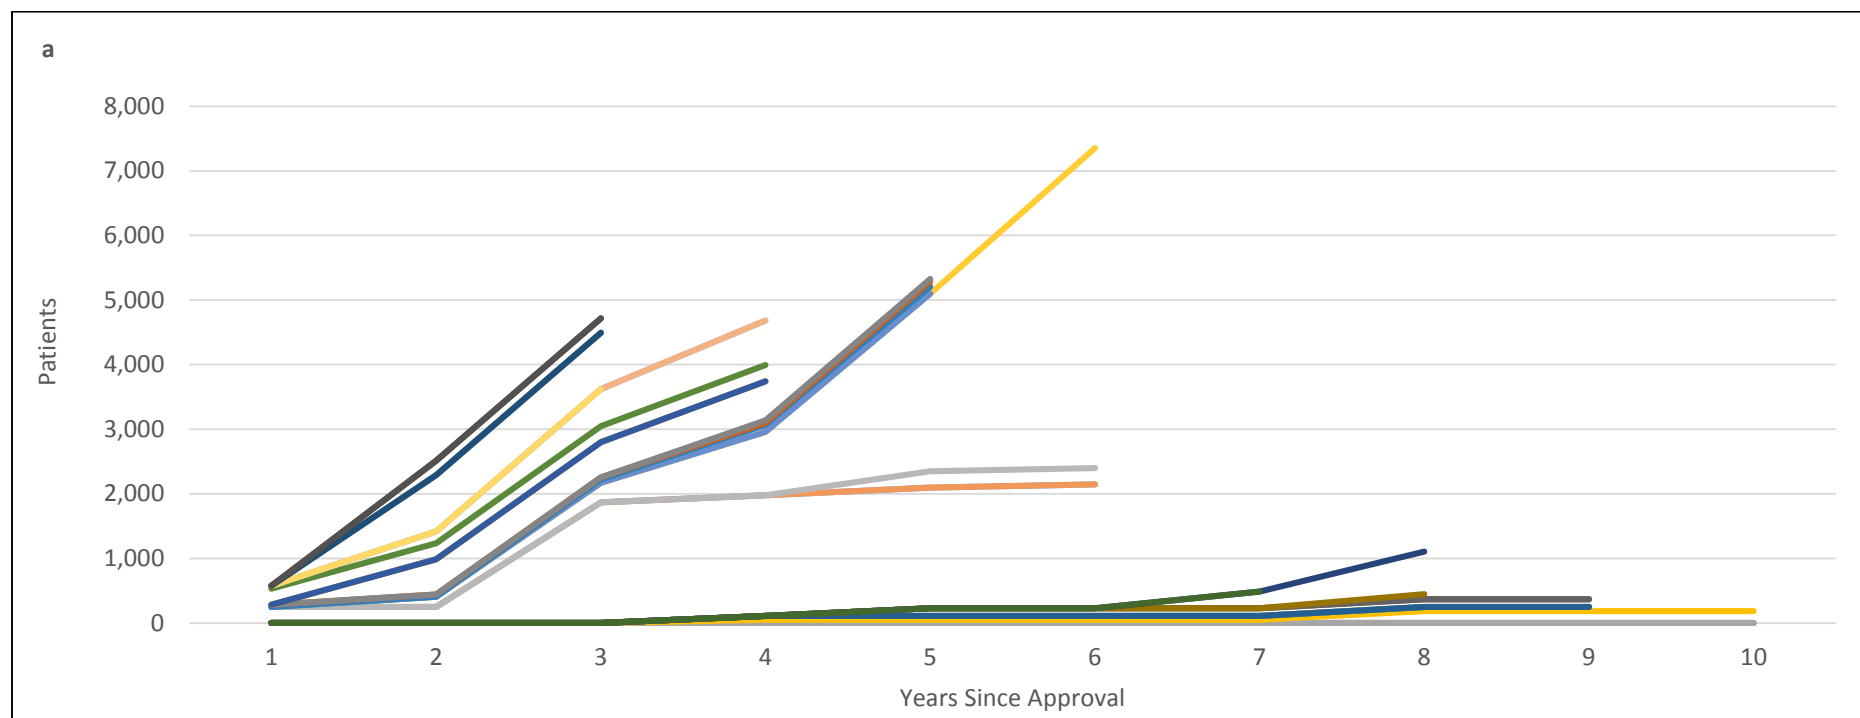

- Galsulfase: Indication 1: Mucopolysaccharidosis VI
- Mecasermin Rinfabate Recombinant: Indication 1: Growth failure
- Alglucosidase Alfa: Indication 1: Pompe Disease
- Anidulafungin: Indication 2: Esophageal candidiasis
- Idursulfase: Indication 1: Hunter Syndrome
- Temsirolimus: Indication 1: RCC
- Dronedarone Hydrochloride: Indication 1: Antiarrhythmic for AFib
- Golimumab: Indication 3: Ankylosing Spondylitis
- Cabazitaxel: Indication 1: Prostate cancer
- Eribulin Mesylate: Indication 1: Breast cancer
- Incobotulinumtoxina: Indication 2: Cervical Dystonia
- Clobazam: Indication 1: Lennox-Gastaut Syndrome
- Ticagrelor: Indication 1: Platelet inhibition s/p MI angina
- Apixaban: Indication 1: Prevention of stroke
- Enzalutamide: Indication 1: Metastatic prostate cancer
- Regorafenib: Indication 1: Metastatic CRC
- Ziv-Aflibercept: Indication 1: Metastatic CRC
- Mecasermin Recombinant: Indication 1: Growth failure
- Micafungin Sodium: Indication 2: HSCT prophylaxis against candida
- Anidulafungin: Indication 1: Candidemia
- Decitabine: Indication 1: MDS
- Retapamulin: Indication 1: Impetigo
- Riloncept: Indication 1: Familial Cold AutoInflam Syndrome
- Golimumab: Indication 2: Psoriatic Arthritis
- Prasugrel Hydrochloride: Indication 1: Platelet inhibitor s/p MI angina
- Dabigatran Etexilate Mesylate: Indication 1: Stroke and PE in Afib
- Incobotulinumtoxina: Indication 1: Blepharospasm
- Abiraterone Acetate: Indication 1: Prostate cancer
- Ipilimumab: Indication 1: Melanoma
- Vemurafenib: Indication 1: Melanoma
- Crofelemer: Indication 1: Diarrhea in HIV pts on ARV
- Lucinactant: Indication 1: RDS
- Teriflunomide: Indication 1: Relapsing MS

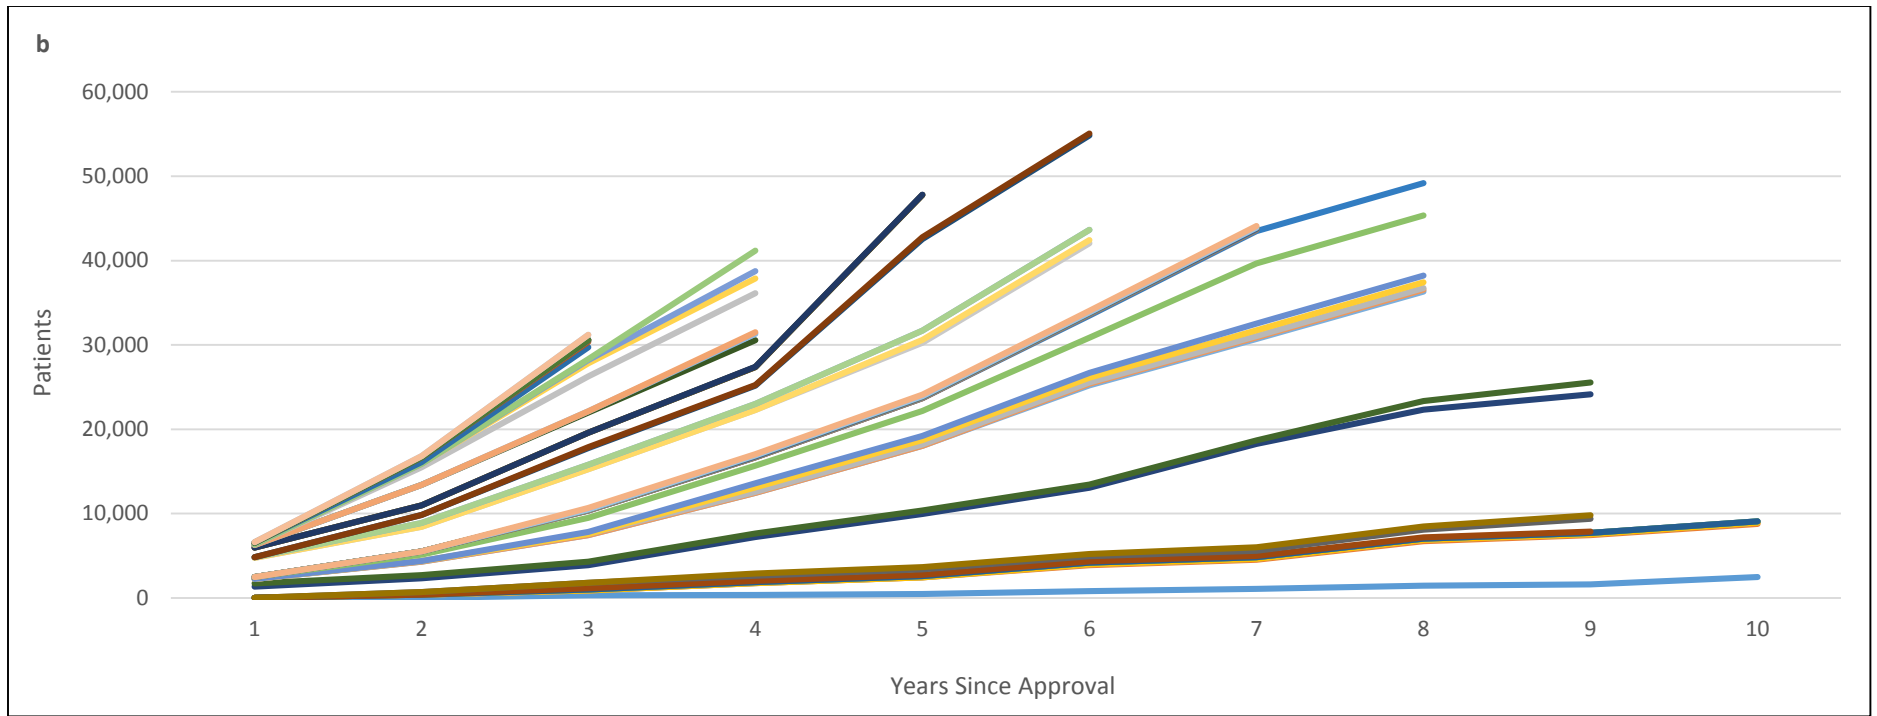

— Entecavir: Indication 1: HBV  
 — Lenalidomide: Indication 1: MDS  
 — Pramlintide Acetate: Indication 1: T2DM  
 — Tipranavir: Indication 1: HIV  
 — Darunavir Ethanolate: Indication 1: HIV  
 — Sitagliptin Phosphate: Indication 1: T2DM  
 — Aliskiren Hemifumarate: Indication 1: HTN  
 — Lanreotide Acetate: Indication 1: Acromegaly  
 — Methoxy Polyethylene Glycol-Epoetin Beta: Indication 1: Anemia assoc. with renal failure  
 — Raltegravir Potassium: Indication 1: HIV  
 — Clevidipine Butyrate: Indication 1: IntraOp BP  
 — Eltrombopag Olamine: Indication 1: Thrombocytopenia in ITP  
 — Plerixafor: Indication 1: Mobilization of HSCT in lymphoma and MM  
 — Artemether; Lumefantrine: Indication 1: Malaria  
 — Pitavastatin Calcium: Indication 1: Hyperlipidemia  
 — Saxagliptin Hydrochloride: Indication 1: T2DM  
 — Liraglutide Recombinant: Indication 1: T2DM  
 — Tesamorelin Acetate: Indication 1: HIV related fat  
 — Boceprevir: Indication 1: Hep C  
 — Indacaterol Maleate: Indication 1: COPD  
 — Rilpivirine Hydrochloride: Indication 1: HIV  
 — Aclidinium Bromide: Indication 1: COPD  
 — Ivacaftor: Indication 1: Cystic Fibrosis  
 — Omacetaxine Mepesuccinate: Indication 1: CML  
 — Tafamprost: Indication 1: Open angle glaucoma / ocular htn  
 — Exenatide Synthetic: Indication 1: T2DM  
 — Nelarabine: Indication 1: Relapsed T-ALL or LBL  
 — Pramlintide Acetate: Indication 2: T1DM  
 — Avobenzone; Ecamsule; Octocrylene: Indication 1: Sunscreen  
 — Dasatinib: Indication 1: CML  
 — Sunitinib Malate: Indication 2: RCC  
 — Ixabepilone: Indication 1: Breast cancer  
 — Maraviroc: Indication 1: HIV  
 — Nebivolol Hydrochloride: Indication 1: HTN  
 — Alvimopan: Indication 1: GI recovery s/p surgery  
 — Difluprednate: Indication 1: Ocular pain  
 — Etravirine: Indication 1: HIV  
 — Romiplostim: Indication 1: Thrombocytopenia in ITP  
 — Febuxostat: Indication 1: Gout  
 — Romidepsin: Indication 1: CTCL  
 — Tolvaptan: Indication 1: Hyponatremia  
 — Pegloticase: Indication 1: Gout  
 — Azilsartan Medoxomil: Indication 1: HTN  
 — Crizotinib: Indication 1: Lung cancer  
 — Linagliptin: Indication 1: T2DM  
 — Telaprevir: Indication 1: Hep C  
 — Cobicistat; Elvitegravir; Emtricitabine; Tenofovir Disoproxil Fumarate: Indication 1: HIV  
 — Ocriplasmin: Indication 1: Symptomatic vitreomacular adhesion  
 — Peginesatide Acetate: Indication 1: Anemia in CKD  
 — Taliglucerase Alfa: Indication 1: Gaucher Disease

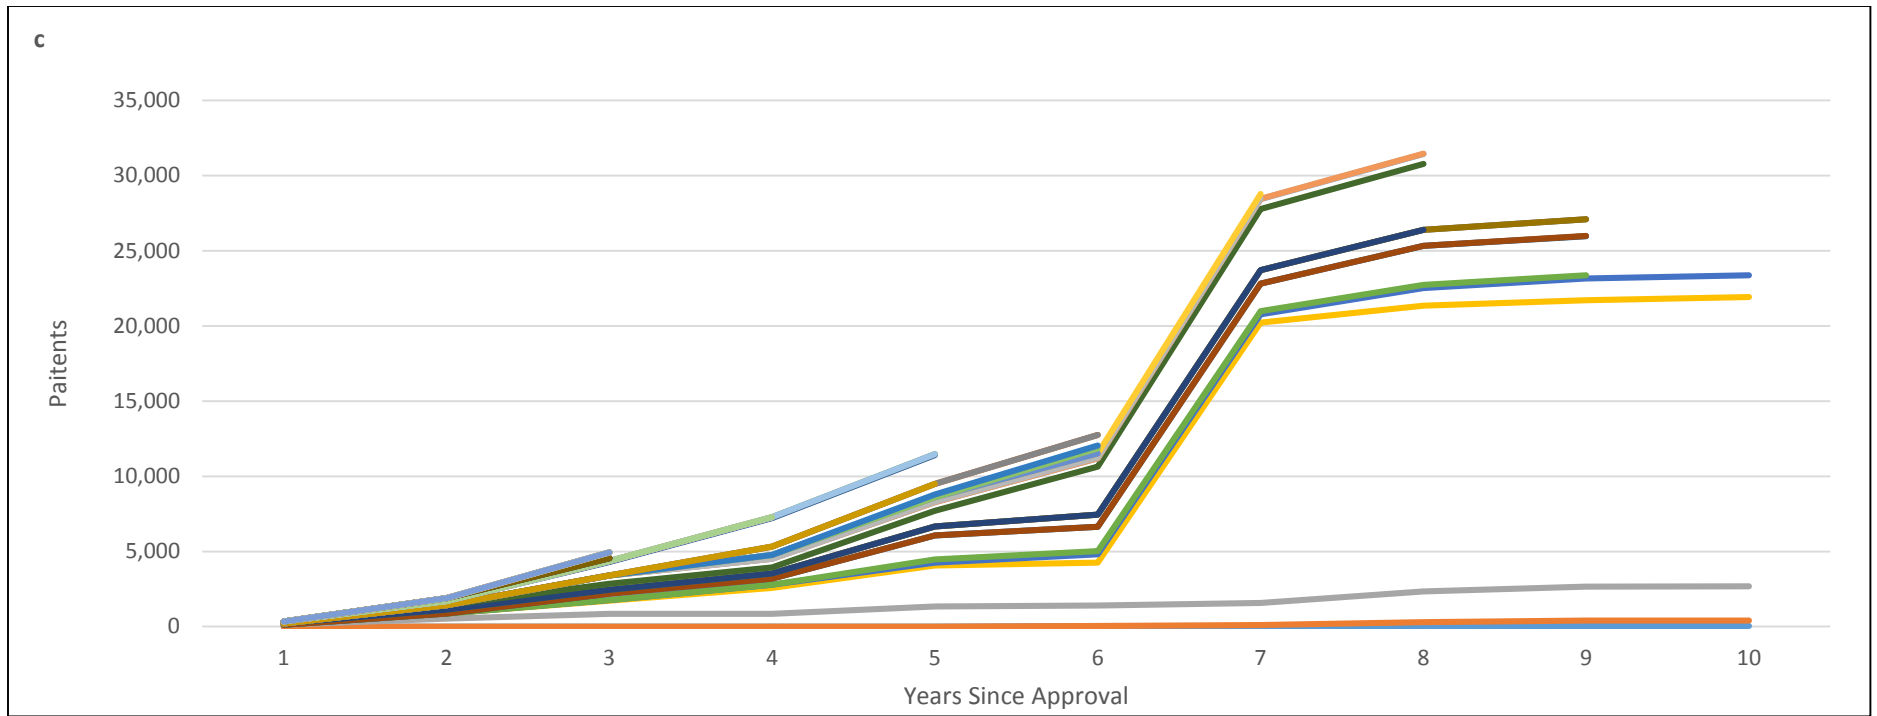

- Conivaptan Hydrochloride: Indication 1: Hyponatremia
- Insulin Detemir Recombinant: Indication 1: T1DM
- Sorafenib Tosylate: Indication 1: RCC
- Panitumumab: Indication 1: Colorectal cancer
- Telbivudine: Indication 1: Hep B
- Eculizumab: Indication 1: PNH
- Nilotinib Hydrochloride Monohydrate: Indication 1: CML
- Bendamustine Hydrochloride: Indication 1: CLL
- Canakinumab: Indication 1: Muckle-Wells Syndrome
- Ofatumumab: Indication 1: CLL
- Pralatrexate: Indication 1: CTCL
- Denosumab: Indication 1: Osteoporosis
- Velaglucerase Alfa: Indication 1: Gaucher Disease
- Brentuximab Vedotin: Indication 1: Hodgkin Lymphoma
- Ruxolitinib Phosphate: Indication 1: Myelofibrosis
- Axitinib: Indication 1: RCC
- Bosutinib Monohydrate: Indication 1: CML
- Carfilzomib: Indication 1: Multiple myeloma
- Pasireotide Diaspartate: Indication 1: Cushing's Disease
- Ponatinib Hydrochloride: Indication 1: Ph+ heme malignancy
- Vismodegib: Indication 1: BCC
- Deferasirox: Indication 1: Fe overload
- Insulin Detemir Recombinant: Indication 2: T2DM
- Bismuth Subcitrate Potassium; Metronidazole; Tetracycline: Indication 1: H Pylori
- Sunitinib Malate: Indication 1: GIST
- Vorinostat: Indication 1: CTCL
- Lapatinib Ditosylate: Indication 1: Breast cancer
- Sapropterin Dihydrochloride: Indication 1: PKU
- Degarelix Acetate: Indication 1: Prostate Cancer
- Everolimus: Indication 1: RCC
- Pazopanib Hydrochloride: Indication 1: RCC
- Carglumic Acid: Indication 1: NAS deficiency
- Polidocanol: Indication 1: Varicose veins
- Asparaginase Erwinia Chrysanthemi: Indication 1: ALL
- Brentuximab Vedotin: Indication 1: Large cell lymphoma
- Vandetanib: Indication 1: Medullary thyroid cancer
- Bedaquiline Fumarate: Indication 1: MDR-TB
- Cabozantinib S-Malate: Indication 1: Medullary thyroid cancer
- Lomitapide Mesylate: Indication 1: Homozygous familial hypercholesterolemia
- Pertuzumab: Indication 1: Breast cancer
- Tbo-Filgrastim: Indication 1: Neutropenia



**APPENDIX FIGURE 3:** Cumulative intervention patient-years exposure among patients enrolled in comparative efficacy studies for each novel therapeutic approved by the Food and Drug Administration between 2005 and 2012 on the basis of a single pivotal trial, pivotal trials that used surrogate markers of disease as primary endpoints, or both (“single/surrogate”), by years since approval; (a) single pivotal approval patient-years exposure, (b) surrogate approval patient-years exposure, (c) single/surrogate approval patient-years exposure.

\* Each year since approval estimated beginning at month-year of approval through following calendar year, with the final year concluding as of December 31, 2014 (the sample search cutoff date; thus, the final year may not represent a complete 12-month calendar year).

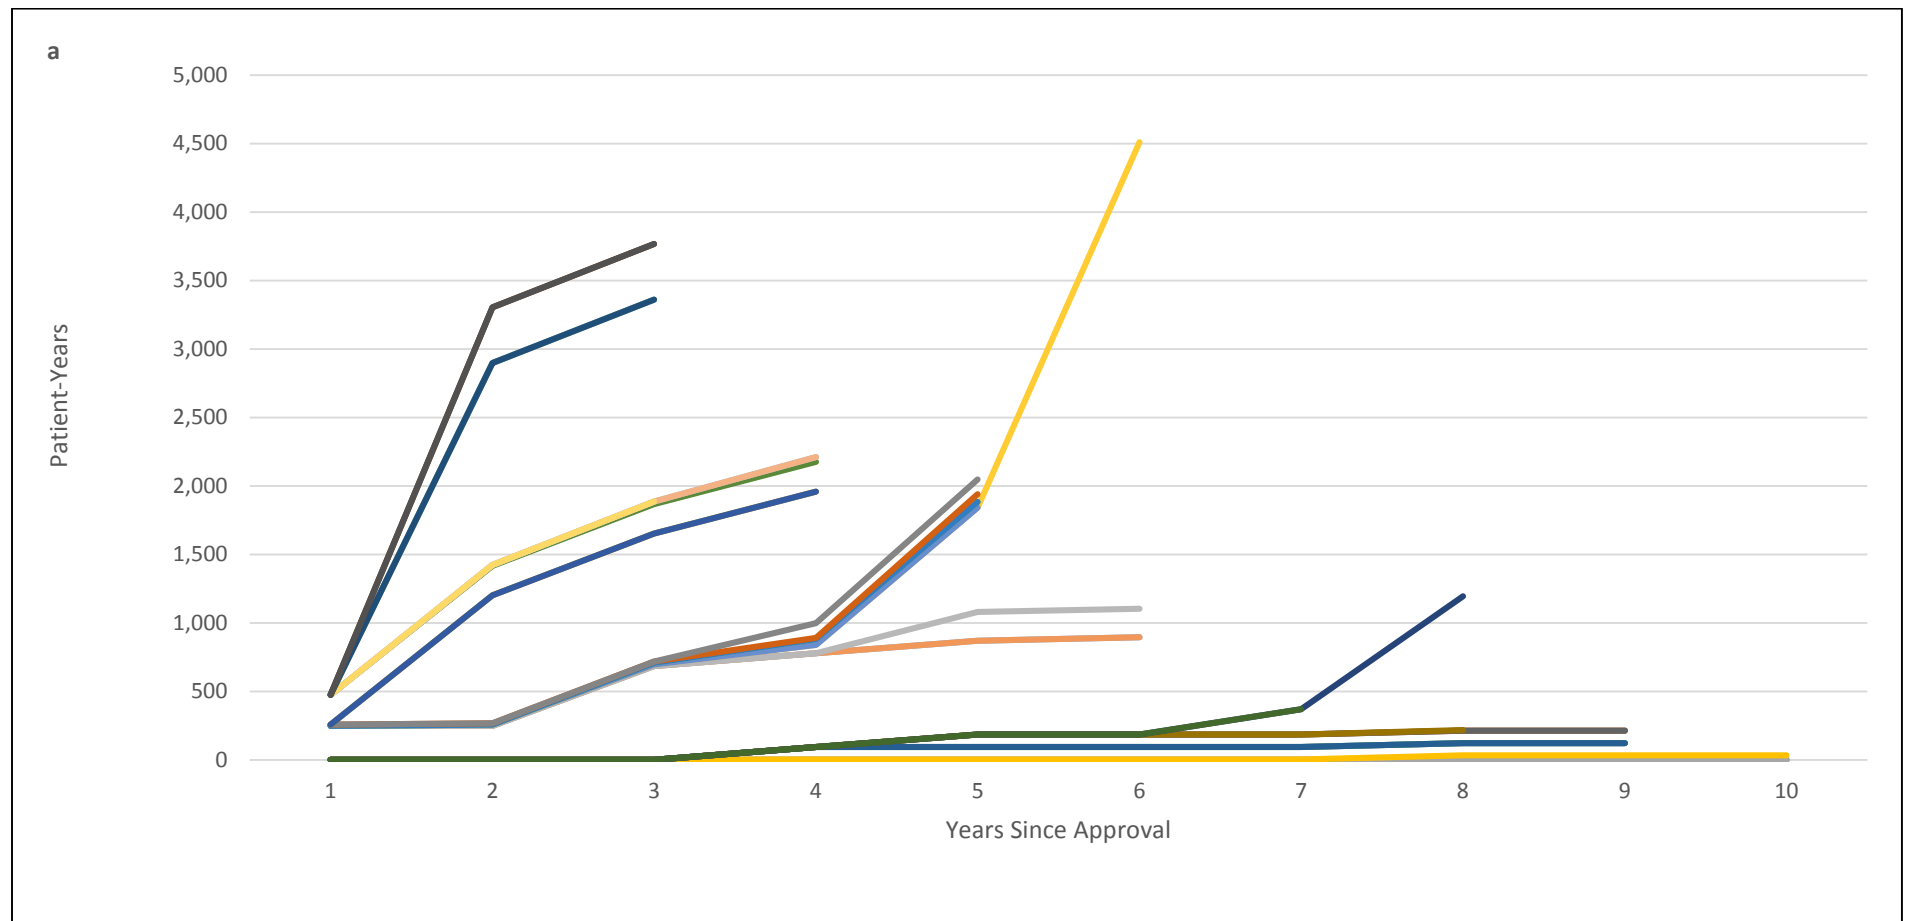

- Galsulfase: Indication 1: Mucopolysaccharidosis VI
- Mecasermin Rinfabate Recombinant: Indication 1: Growth failure
- Alglucosidase Alfa: Indication 1: Pompe Disease
- Anidulafungin: Indication 2: Esophageal candidiasis
- Idursulfase: Indication 1: Hunter Syndrome
- Temsirolimus: Indication 1: RCC
- Dronedarone Hydrochloride: Indication 1: Antiarrhythmic for AFib
- Golimumab: Indication 3: Ankylosing Spondylitis
- Cabazitaxel: Indication 1: Prostate cancer
- Eribulin Mesylate: Indication 1: Breast cancer
- IncobotulinumtoxinA: Indication 2: Cervical Dystonia
- Clobazam: Indication 1: Lennox-Gastaut Syndrome
- Ticagrelor: Indication 1: Platelet inhibition s/p MI angina
- Apixaban: Indication 1: Prevention of stroke
- Enzalutamide: Indication 1: Metastatic prostate cancer
- Regorafenib: Indication 1: Metastatic CRC
- Ziv-Aflibercept: Indication 1: Metastatic CRC
- Mecasermin Recombinant: Indication 1: Growth failure
- Micafungin Sodium: Indication 2: HSCT prophylaxis against candida
- Anidulafungin: Indication 1: Candidemia
- Decitabine: Indication 1: MDS
- Retapamulin: Indication 1: Impetigo
- Rilonecept: Indication 1: Familial Cold AutoInflam Syndrome
- Golimumab: Indication 2: Psoriatic Arthritis
- Prasugrel Hydrochloride: Indication 1: Platelet inhibitor s/p MI angina
- Dabigatran Etxilate Mesylate: Indication 1: Stroke and PE in Afib
- IncobotulinumtoxinA: Indication 1: Blepharospasm
- Abiraterone Acetate: Indication 1: Prostate cancer
- Ipilimumab: Indication 1: Melanoma
- Vemurafenib: Indication 1: Melanoma
- Crofelemer: Indication 1: Diarrhea in HIV pts on ARV
- Lucinactant: Indication 1: RDS
- Teriflunomide: Indication 1: Relapsing MS

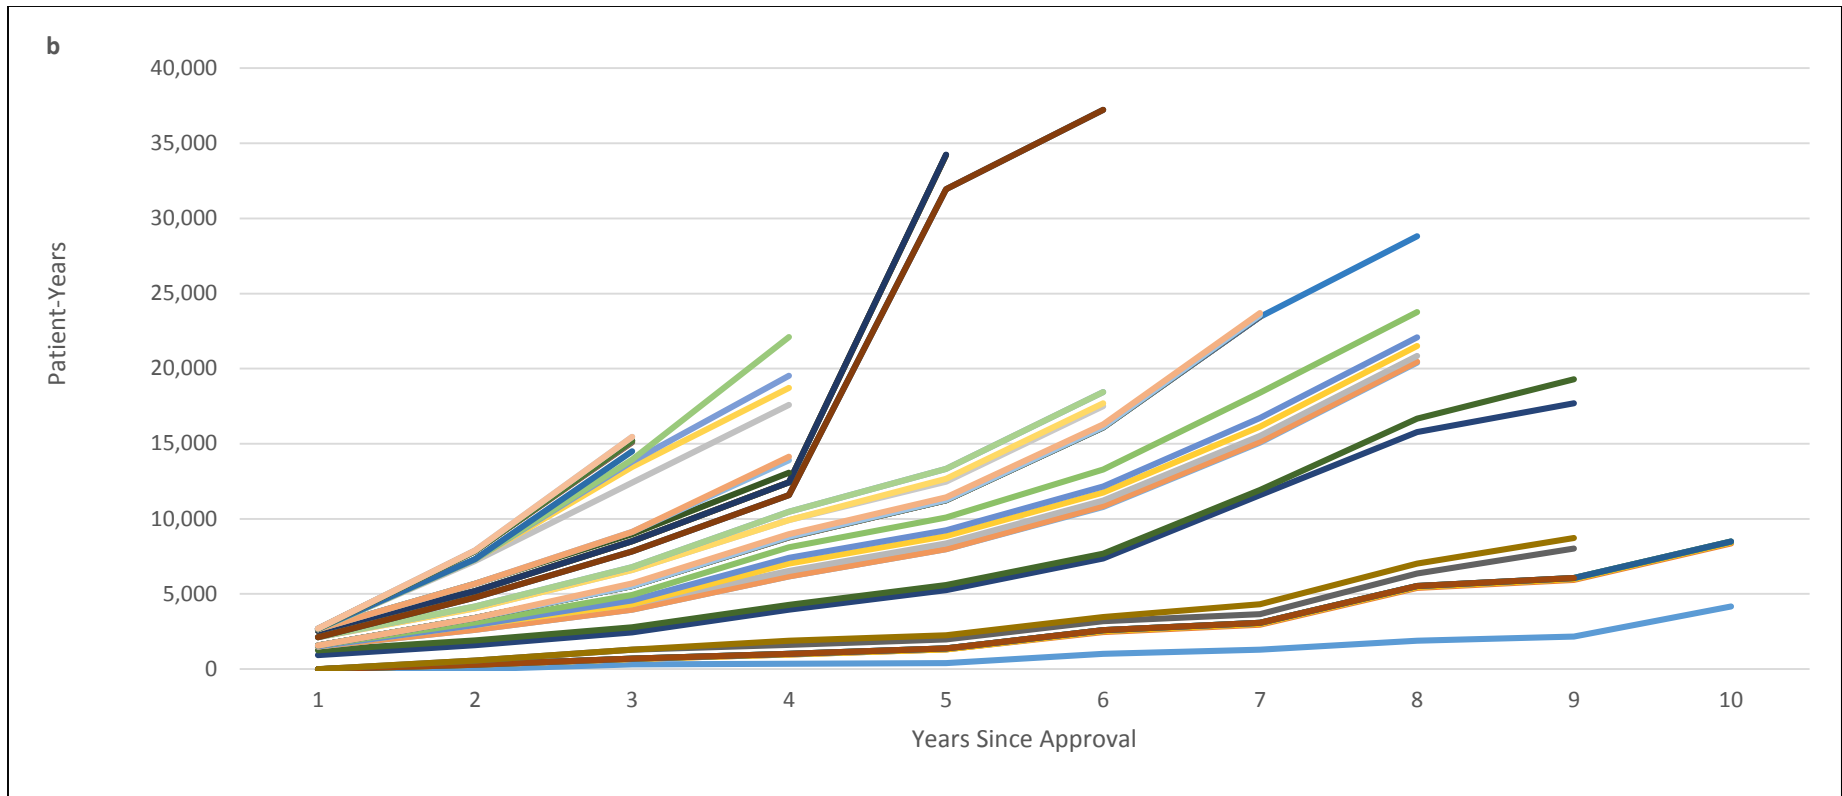

— Entecavir: Indication 1: HBV  
 — Lenalidomide: Indication 1: MDS  
 — Pramlintide Acetate: Indication 1: T2DM  
 — Tipranavir: Indication 1: HIV  
 — Darunavir Ethanolate: Indication 1: HIV  
 — Sitagliptin Phosphate: Indication 1: T2DM  
 — Aliskiren Hemifumarate: Indication 1: HTN  
 — Lanreotide Acetate: Indication 1: Acromegaly  
 — Methoxy Polyethylene Glycol-Epoetin Beta: Indication 1: Anemia assoc. with renal failure  
 — Raltegravir Potassium: Indication 1: HIV  
 — Clevidipine Butyrate: Indication 1: IntraOp BP  
 — Eltrombopag Olamine: Indication 1: Thrombocytopenia in ITP  
 — Plerixafor: Indication 1: Mobilization of HSC T in lymphoma and MM  
 — Artemether; Lumefantrine: Indication 1: Malaria  
 — Pitavastatin Calcium: Indication 1: Hyperlipidemia  
 — Saxagliptin Hydrochloride: Indication 1: T2DM  
 — Liraglutide Recombinant: Indication 1: T2DM  
 — Tesamorelin Acetate: Indication 1: HIV related fat  
 — Boceprevir: Indication 1: Hep C  
 — Indacaterol Maleate: Indication 1: COPD  
 — Rilpivirine Hydrochloride: Indication 1: HIV  
 — Acridinium Bromide: Indication 1: COPD  
 — Ivacaftor: Indication 1: Cystic Fibrosis  
 — Omacetaxine Mepesuccinate: Indication 1: CML  
 — Tafluprost: Indication 1: Open angle glaucoma / ocular htn  
 — Exenatide Synthetic: Indication 1: T2DM  
 — Nelarabine: Indication 1: Relapsed T-ALL or LBL  
 — Pramlintide Acetate: Indication 2: T1DM  
 — Avobenzon; Ecamsule; Octocrylene: Indication 1: Sunscreen  
 — Dasatinib: Indication 1: CML  
 — Sunitinib Malate: Indication 2: RCC  
 — Ixabepilone: Indication 1: Breast cancer  
 — Maraviroc: Indication 1: HIV  
 — Nebivolol Hydrochloride: Indication 1: HTN  
 — Alvimopan: Indication 1: GI recovery s/p surgery  
 — Difluprednate: Indication 1: Ocular pain  
 — Etravirine: Indication 1: HIV  
 — Romiplostim: Indication 1: Thrombocytopenia in ITP  
 — Febuxostat: Indication 1: Gout  
 — Romidepsin: Indication 1: CTCL  
 — Tolvaptan: Indication 1: Hyponatremia  
 — Pegloticase: Indication 1: Gout  
 — Azilsartan Medoxomil: Indication 1: HTN  
 — Crizotinib: Indication 1: Lung cancer  
 — Linagliptin: Indication 1: T2DM  
 — Telaprevir: Indication 1: Hep C  
 — Cobicistat; Elvitegravir; Emtricitabine; Tenofovir Disoproxil Fumarate: Indication 1: HIV  
 — Ocriplasm in: Indication 1: Symptomatic vitreomacular adhesion  
 — Peginesatide Acetate: Indication 1: Anemia in CKD  
 — Taliglucerase Alfa: Indication 1: Gaucher Disease

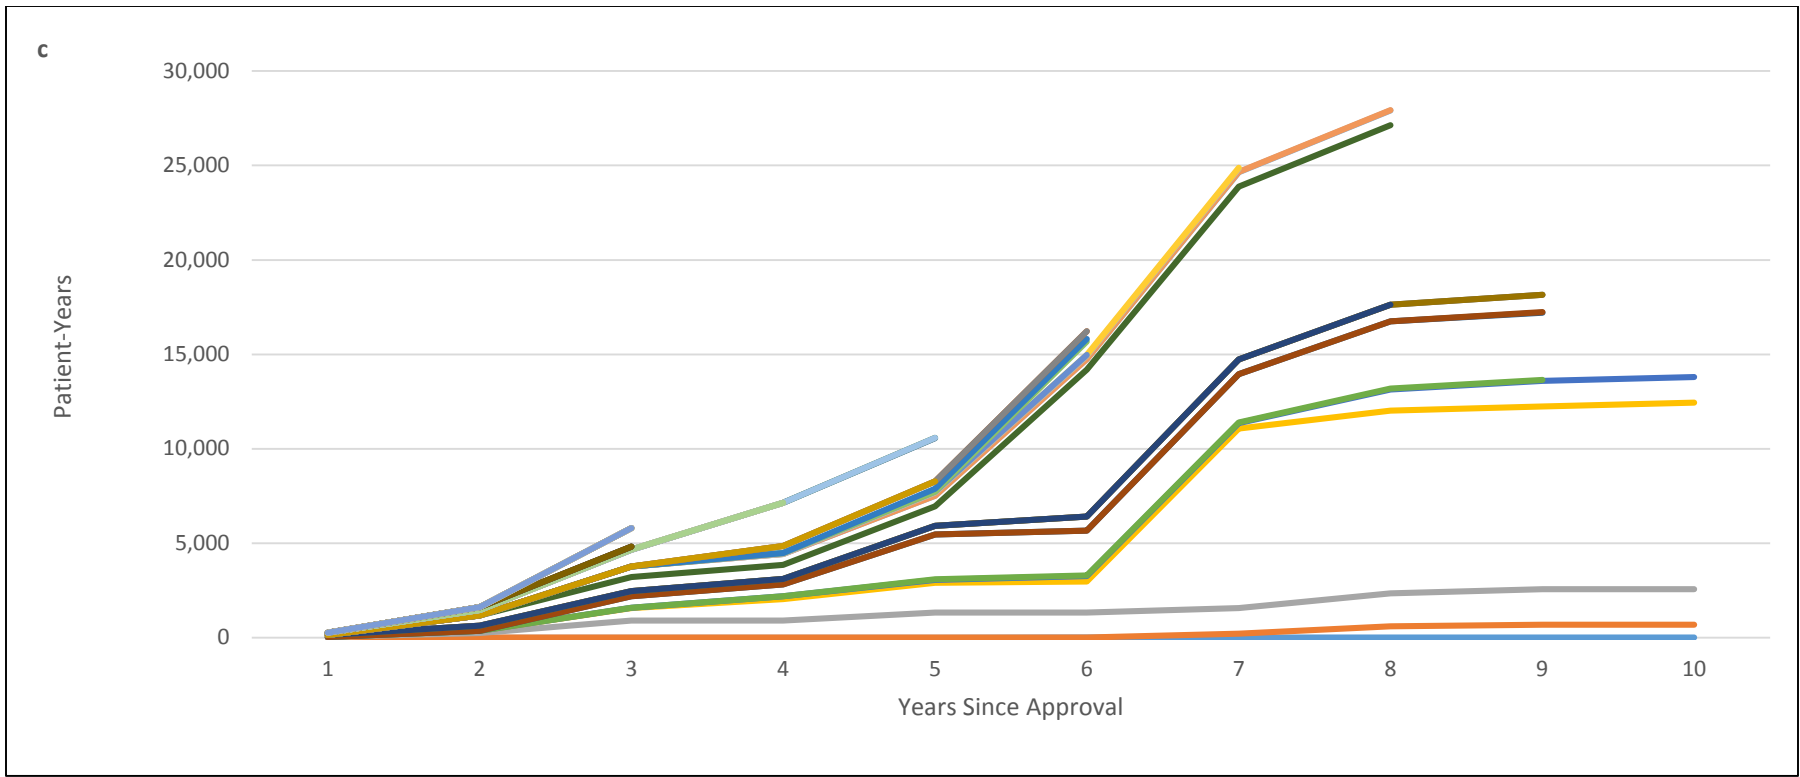

— Conivaptan Hydrochloride: Indication 1: Hyponatremia  
 — Insulin Detemir Recombinant: Indication 1: T1DM  
 — Sorafenib Tosylate: Indication 1: RCC  
 — Panitumumab: Indication 1: Colorectal cancer  
 — Telbivudine: Indication 1: Hep B  
 — Eculizumab: Indication 1: PNH  
 — Nilotinib Hydrochloride Monohydrate: Indication 1: CML  
 — Bendamustine Hydrochloride: Indication 1: CLL  
 — Canakinumab: Indication 1: Muckle-Wells Syndrome  
 — Ofatumumab: Indication 1: CLL  
 — Pralatrexate: Indication 1: CTCL  
 — Denosumab: Indication 1: Osteoporosis  
 — Velaglucerase Alfa: Indication 1: Gaucher Disease  
 — Brentuximab Vedotin: Indication 1: Hodgkin Lymphoma  
 — Ruxolitinib Phosphate: Indication 1: Myelofibrosis  
 — Axitinib: Indication 1: RCC  
 — Bosutinib Monohydrate: Indication 1: CML  
 — Carfilzomib: Indication 1: Multiple myeloma  
 — Pasireotide Diaspartate: Indication 1: Cushing's Disease  
 — Ponatinib Hydrochloride: Indication 1: Ph+ heme malignancy  
 — Vismodegib: Indication 1: BCC  
 — Deferasirox: Indication 1: Fe overload  
 — Insulin Detemir Recombinant: Indication 2: T2DM  
 — Bismuth Subcitrate Potassium; Metronidazole; Tetracycline: Indication 1: H Pylori  
 — Sunitinib Malate: Indication 1: GIST  
 — Vorinostat: Indication 1: CTCL  
 — Lapatinib Ditosylate: Indication 1: Breast cancer  
 — Sapropterin Dihydrochloride: Indication 1: PKU  
 — Degarelix Acetate: Indication 1: Prostate Cancer  
 — Everolimus: Indication 1: RCC  
 — Pazopanib Hydrochloride: Indication 1: RCC  
 — Carglumic Acid: Indication 1: NAS deficiency  
 — Polidocanol: Indication 1: Varicose veins  
 — Asparaginase Erwinia Chrysanthemi: Indication 1: ALL  
 — Brentuximab Vedotin: Indication 1: Large cell lymphoma  
 — Vandetanib: Indication 1: Medullary thyroid cancer  
 — Bedaquiline Fumarate: Indication 1: MDR-TB  
 — Cabozantinib S-Malate: Indication 1: Medullary thyroid cancer  
 — Lomitapide Mesylate: Indication 1: Homozygous familial hypercholesterolemia  
 — Pertuzumab: Indication 1: Breast cancer  
 — Tbo-Filgrastim: Indication 1: Neutropenia
